# Supplementary material
Source: Springer Nature journal article supplement (https://www.springermedizin.de/resource/supplementary/12911_2005_107_MOESM2_ESM.pdf/9527144)
Supplement: MOESM2 [file 9527144]

### DNSGP-2

90 GP practices  
233,303 patients

+

### SFK

123 pharmacies  
332,707 patients  
89 GP practices

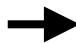

### Eligible for matching

170,000 patients  
89 GP practices

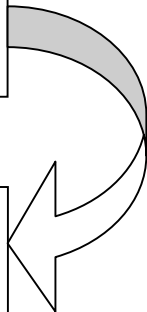

### Blocking on:

1. Gender
2. Year of birth
3. Postal code

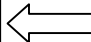

+ Full ATC-code

98,775 patients

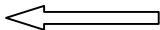

+ 3 characters of  
ATC-code

+ 11,327 patients

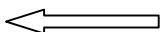

---

**110,102 patients**  
**from 83 GP practices**
